# Supplementary material
Source: Springer Nature journal article supplement (https://www.springermedizin.de/resource/supplementary/12916_2014_972_MOESM2_ESM.pdf/9598960)
Supplement: MOESM2 [file 9598960]

## **Supplementary Data 2 (Bell & Britton)**

**Online-only table of contents**

### **Supplementary data 2**

- **Supplementary Table 2A – Detailed parameter estimates (95% confidence intervals) for all LCS model specifications of weekly alcohol consumption and mental health symptoms in the Whitehall II study**

**Supplementary Table 2A - Detailed parameter estimates (95% confidence intervals) for all LCS model specifications of weekly alcohol consumption and mental health symptoms in the Whitehall II study**

| <b>Baseline</b>                                                       | <b>Age and sex adjusted</b> |                         | <b>Fully adjusted</b>      |                         |
|-----------------------------------------------------------------------|-----------------------------|-------------------------|----------------------------|-------------------------|
| <i>Fixed effects</i>                                                  |                             |                         |                            |                         |
|                                                                       | <b>Alcohol</b>              | <b>MCS</b>              | <b>Alcohol</b>             | <b>MCS</b>              |
| Intercept                                                             | 17.15*** (16.73, 17.57)     | 51.57*** (51.31, 51.82) | 17.63*** (16.69, 18.57)    | 53.46*** (52.86, 54.05) |
| Slope ( $\alpha$ )                                                    | 4.82*** (3.26, 6.39)        | 5.34 (-8.16, 18.85)     | 5.22*** (3.56, 6.89)       | 7.77 (-4.69, 20.24)     |
| Autoproportional ( $\beta$ )                                          | -0.43*** (-0.53, -0.33)     | -0.08 (-0.34, 0.18)     | -0.42*** (-0.52, -0.33)    | -0.12 (-0.36, 0.11)     |
| Coupling ( $\gamma$ )                                                 |                             |                         |                            |                         |
| <i>Random effects</i>                                                 |                             |                         |                            |                         |
| Residual variance                                                     | 36.29*** (34.78, 37.80)     | 34.89*** (33.38, 36.39) | 36.34*** (34.82, 37.85)    | 34.77*** (33.3, 36.24)  |
| Intercept variance                                                    | 176.69*** (169.11, 184.27)  | 47.38*** (44.21, 50.55) | 143.00*** (136.55, 149.45) | 40.15*** (37.26, 43.04) |
| Slope variance                                                        | 15.93*** (8.23, 23.63)      | 2.41*** (1.4, 3.43)     | 13.88*** (7.51, 20.25)     | 2.02*** (0.90, 3.14)    |
| Intercept/slope correlation                                           | 0.69***                     | -0.29                   | 0.65***                    | -0.10                   |
| Intercepts correlation                                                | -0.03                       |                         | 0.01                       |                         |
| Slopes correlation                                                    | -0.13*                      |                         | -0.12                      |                         |
| Alcohol intercept, MCS slope correlation                              | -0.04                       |                         | -0.04                      |                         |
| MCS intercept, alcohol slope correlation                              | 0.03                        |                         | 0.05                       |                         |
| <b>Alcohol <math>\rightarrow</math> <math>\Delta</math> MCS model</b> | <b>Age and sex adjusted</b> |                         | <b>Fully adjusted</b>      |                         |
| <i>Fixed effects</i>                                                  |                             |                         |                            |                         |
|                                                                       | <b>Alcohol</b>              | <b>MCS</b>              | <b>Alcohol</b>             | <b>MCS</b>              |
| Intercept                                                             | 17.15*** (16.73, 17.57)     | 51.57*** (51.31, 51.83) | 17.63*** (16.70, 18.57)    | 53.47*** (52.87, 54.06) |
| Slope ( $\alpha$ )                                                    | 4.83*** (3.26, 6.39)        | 7.86 (-8.21, 23.94)     | 5.23*** (3.56, 6.89)       | 10.82 (-3.90, 25.55)    |
| Autoproportional ( $\beta$ )                                          | -0.43*** (-0.53, -0.33)     | -0.12 (-0.41, 0.17)     | -0.43*** (-0.52, -0.33)    | -0.17 (-0.42, 0.09)     |
| Coupling ( $\gamma$ )                                                 | -0.03 (-0.15, 0.09)         |                         | -0.04 (-0.15, 0.08)        |                         |

| Supplementary Table 2A. Parameter estimates (95% confidence intervals) for LCS models of weekly alcohol consumption and mental health symptoms in the Whitehall II study (continued) |                             |                         |                            |                         |
|--------------------------------------------------------------------------------------------------------------------------------------------------------------------------------------|-----------------------------|-------------------------|----------------------------|-------------------------|
| <b>Random effects</b>                                                                                                                                                                |                             |                         |                            |                         |
| Residual variance                                                                                                                                                                    | 36.30*** (34.78, 37.81)     | 34.79*** (33.23, 36.34) | 36.35*** (34.83, 37.86)    | 34.65*** (33.14, 36.16) |
| Intercept variance                                                                                                                                                                   | 176.68*** (169.10, 184.27)  | 47.55*** (44.30, 50.79) | 142.98*** (136.53, 149.44) | 40.34*** (37.39, 43.29) |
| Slope variance                                                                                                                                                                       | 15.93*** (8.22, 23.64)      | 2.50** (0.98, 4.03)     | 13.89*** (7.51, 20.27)     | 2.32* (0.09, 4.56)      |
| Intercept/slope correlation                                                                                                                                                          | 0.69***                     | -0.14                   | 0.65***                    | 0.08                    |
| Intercepts correlation                                                                                                                                                               | -0.02                       |                         | 0.02                       |                         |
| Slopes correlation                                                                                                                                                                   | 0.06                        |                         | 0.11                       |                         |
| Alcohol intercept, MCS slope correlation                                                                                                                                             | 0.19                        |                         | 0.23                       |                         |
| MCS intercept, alcohol slope correlation                                                                                                                                             | 0.03                        |                         | 0.05                       |                         |
| <b>MCS → Δ Alcohol model</b>                                                                                                                                                         | <b>Age and sex adjusted</b> |                         | <b>Fully adjusted</b>      |                         |
| <b>Fixed effects</b>                                                                                                                                                                 |                             |                         |                            |                         |
|                                                                                                                                                                                      | <b>Alcohol</b>              | <b>MCS</b>              | <b>Alcohol</b>             | <b>MCS</b>              |
| Intercept                                                                                                                                                                            | 17.11 (16.69, 17.53)        | 51.54*** (51.28, 51.79) | 17.58 (16.64, 18.52)       | 53.41*** (52.81, 54)    |
| Slope (α)                                                                                                                                                                            | 21.46** (8.50, 34.43)       | 4.96 (-8.62, 18.54)     | 23.31*** (11.00, 35.62)    | 7.20 (-5.55, 19.96)     |
| Autoproportional (β)                                                                                                                                                                 | -0.50*** (-0.61, -0.40)     | -0.07 (-0.33, 0.19)     | -0.50*** (-0.60, -0.41)    | -0.11 (-0.35, 0.12)     |
| Coupling (γ)                                                                                                                                                                         |                             | -0.30* (-0.53, -0.06)   |                            | -0.31** (-0.52, -0.10)  |
| <b>Random effects</b>                                                                                                                                                                |                             |                         |                            |                         |
| Residual variance                                                                                                                                                                    | 35.77*** (34.23, 37.30)     | 35.02*** (33.51, 36.54) | 35.77*** (34.25, 37.29)    | 34.94*** (33.45, 36.42) |
| Intercept variance                                                                                                                                                                   | 177.95*** (170.31, 185.58)  | 46.91*** (43.70, 50.11) | 144.21*** (137.72, 150.71) | 39.66*** (36.75, 42.58) |
| Slope variance                                                                                                                                                                       | 26.26*** (12.55, 39.98)     | 2.31*** (1.27, 3.34)    | 23.66*** (12.24, 35.08)    | 1.88** (0.81, 2.95)     |
| Intercept/slope correlation                                                                                                                                                          | 0.69***                     | -0.30                   | 0.67***                    | -0.12                   |
| Intercepts correlation                                                                                                                                                               | -0.02                       |                         | 0.02                       |                         |
| Slopes correlation                                                                                                                                                                   | -0.11                       |                         | -0.02                      |                         |
| Alcohol intercept, MCS slope correlation                                                                                                                                             | -0.05                       |                         | -0.06                      |                         |

| Supplementary Table 2A. Parameter estimates (95% confidence intervals) for LCS models of weekly alcohol consumption and mental health symptoms in the Whitehall II study (continued) |                             |                         |                            |                         |
|--------------------------------------------------------------------------------------------------------------------------------------------------------------------------------------|-----------------------------|-------------------------|----------------------------|-------------------------|
| MCS intercept, alcohol slope correlation                                                                                                                                             | 0.37**                      |                         | 0.40***                    |                         |
| <b>Reciprocal <math>\Delta</math> model</b>                                                                                                                                          | <b>Age and sex adjusted</b> |                         | <b>Fully adjusted</b>      |                         |
| <i>Fixed effects</i>                                                                                                                                                                 |                             |                         |                            |                         |
|                                                                                                                                                                                      | <b>Alcohol</b>              | <b>MCS</b>              | <b>Alcohol</b>             | <b>MCS</b>              |
| Intercept                                                                                                                                                                            | 17.11*** (16.69, 17.54)     | 51.55*** (51.29, 51.81) | 17.59*** (16.65, 18.53)    | 53.42*** (52.83, 54.02) |
| Slope ( $\alpha$ )                                                                                                                                                                   | 21.49** (9.07, 33.92)       | 8.72 (-6.03, 23.47)     | 23.2*** (11.42, 34.99)     | 11.05 (-2.7, 24.79)     |
| Autoproportional ( $\beta$ )                                                                                                                                                         | -0.50*** (-0.6, -0.4)       | -0.13 (-0.4, 0.14)      | -0.50*** (-0.59, -0.40)    | -0.17 (-0.41, 0.08)     |
| Coupling ( $\gamma$ )                                                                                                                                                                | -0.05 (-0.16, 0.06)         | -0.30** (-0.52, -0.07)  | -0.06 (-0.16, 0.05)        | -0.31** (-0.52, -0.11)  |
| <i>Random effects</i>                                                                                                                                                                |                             |                         |                            |                         |
| Residual variance                                                                                                                                                                    | 35.77*** (34.23, 37.3)      | 34.86*** (33.32, 36.4)  | 35.78*** (34.25, 37.3)     | 34.77*** (33.26, 36.28) |
| Intercept variance                                                                                                                                                                   | 177.97*** (170.33, 185.6)   | 47.16*** (43.91, 50.42) | 144.21*** (137.71, 150.71) | 39.91*** (36.95, 42.87) |
| Slope variance                                                                                                                                                                       | 25.75*** (12.76, 38.73)     | 2.67* (0.51, 4.82)      | 23.05*** (12.28, 33.82)    | 2.42 (-0.04, 4.88)      |
| Intercept/slope correlation                                                                                                                                                          | 0.69***                     | -0.08                   | 0.66***                    | 0.09                    |
| Intercepts correlation                                                                                                                                                               | -0.02                       |                         | 0.03                       |                         |
| Slopes correlation                                                                                                                                                                   | 0.28                        |                         | 0.37                       |                         |
| Alcohol intercept, MCS slope correlation                                                                                                                                             | 0.32                        |                         | 0.33                       |                         |
| MCS intercept, alcohol slope correlation                                                                                                                                             | 0.38**                      |                         | 0.41***                    |                         |

\*\*\* p < 0.001; \*\* p < 0.01; \* p < 0.05

N=6,330

Fully adjusted = age (centred around the sample mean), sex (male referent group), ethnicity (white [referent] vs non-white), socioeconomic status (defined by last recorded employment grade – entered as a linear term with high [referent], intermediate and low categories), marital status (married/cohabiting [referent] vs other), highest educational qualification (University [referent], post-secondary, secondary or no qualifications – entered as a continuous variable), economic activity (active [referent] vs in-active

[merging retired and unemployed groups together]), social network (centred around the mean score), current smoking status (no [referent] vs yes), level of physical activity (active [referent], moderately active or low – entered as a linear term), CAGE caseness (no case [referent] vs case), use of anti-depressant medication was also controlled for (no [referent] vs current), self-reported long-standing physical illness (no [referent] vs yes), belonging to the lowest sex-specific SF-36 physical health component quartile (no [referent] vs yes), known diabetes (no [referent] vs yes), CHD (no [referent] vs yes), stroke (no [referent] vs yes), TIA (no [referent] vs yes), total serum cholesterol (centred around the sample mean), systolic and diastolic blood pressure (centred around their mean values), a resting heart rate > 80 beats per minute (no [referent] vs yes) and BMI (centred around the sample mean).
